# Supplementary material for: Enhanced inflammatory response mediated by parenchymal cells associates with resistance towards mTOR inhibition
Source: bioRxiv or medRxiv preprint supplement (doi:10.1101/2020.08.06.239426), 2020-08-06

**A****Mtor KO efficiency in hepatocytes**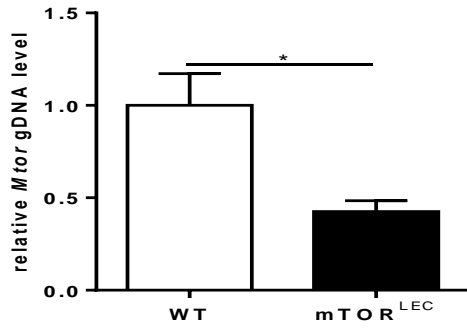**B**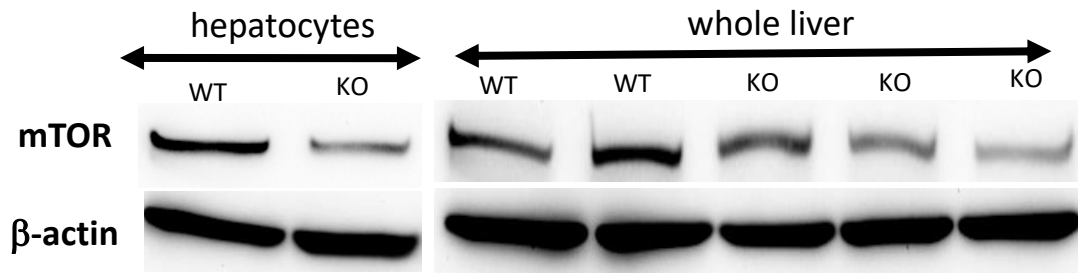**C**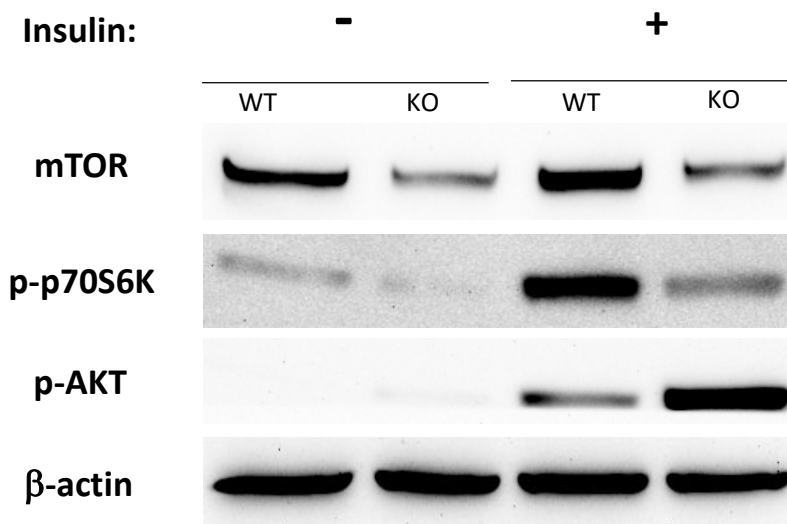

**A**

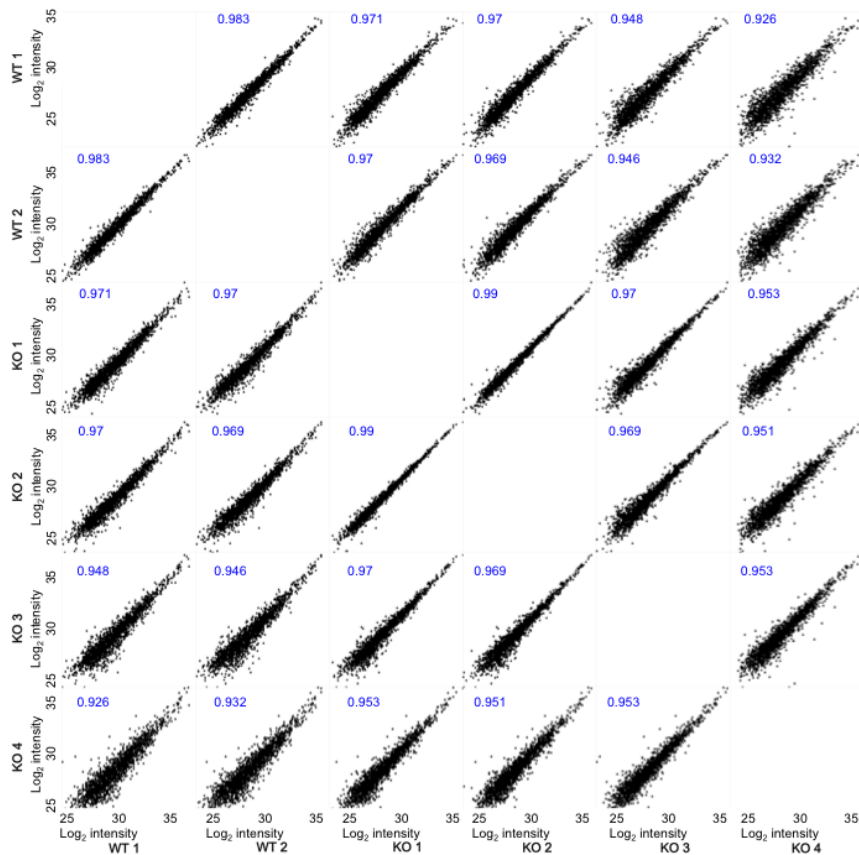

**B**

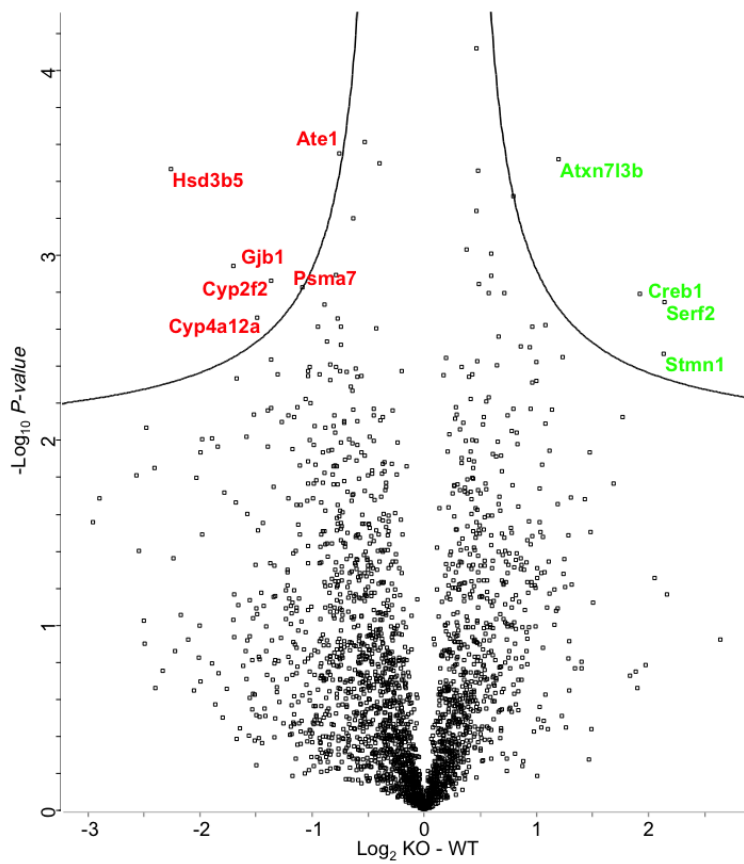



WT

mTOR<sup>LEC</sup>

Ki-67

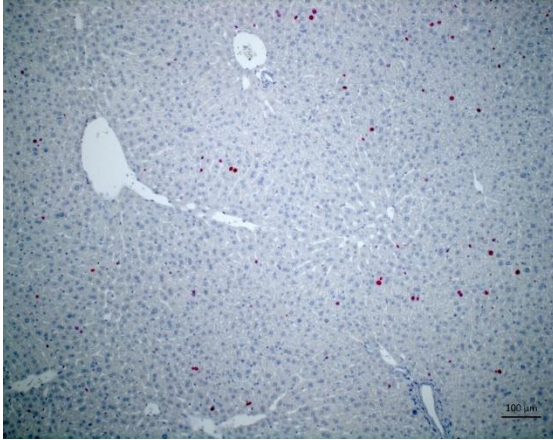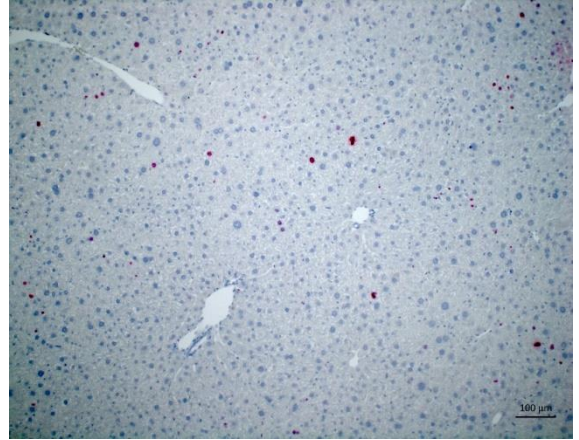

Caspase-3

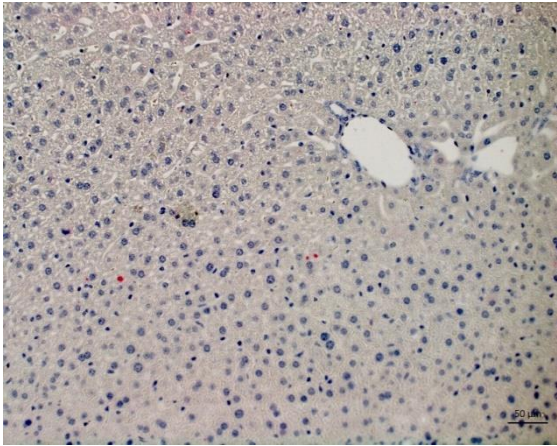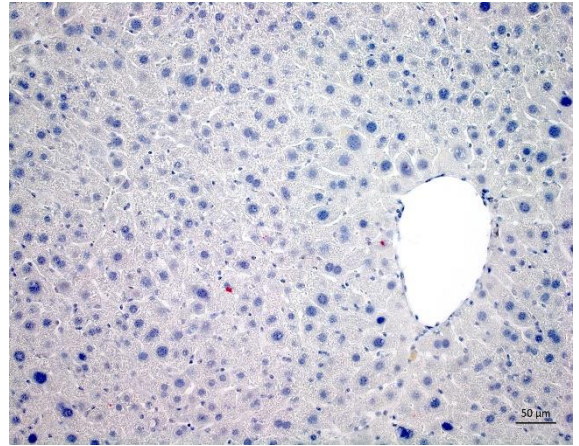

Ki67

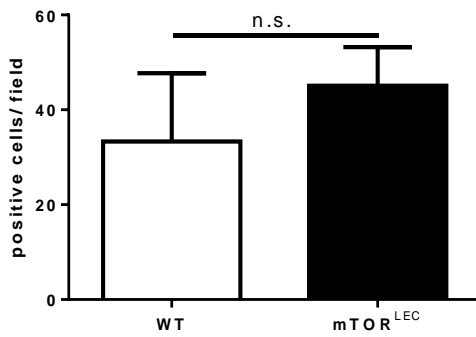

Caspase3

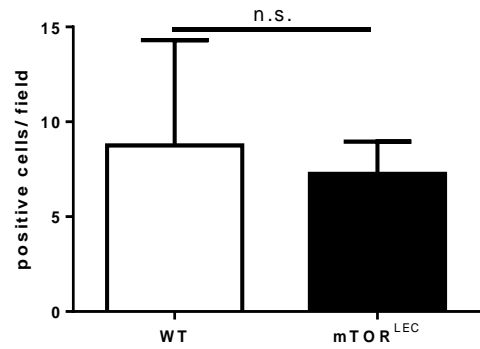

**A**

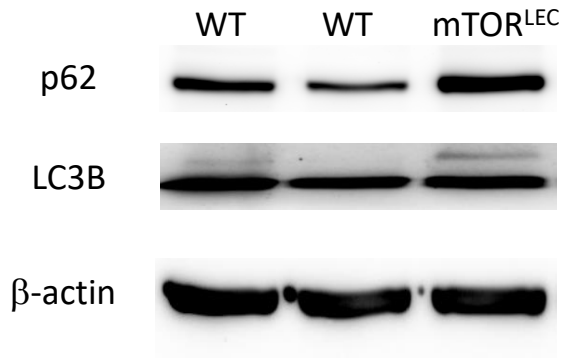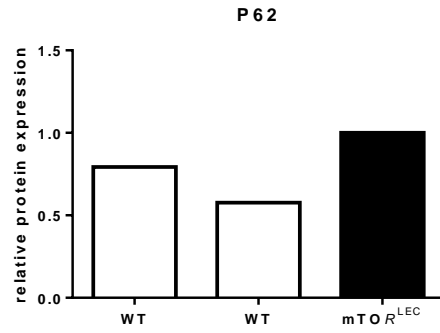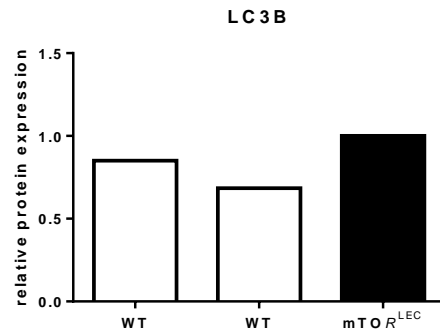

**B**

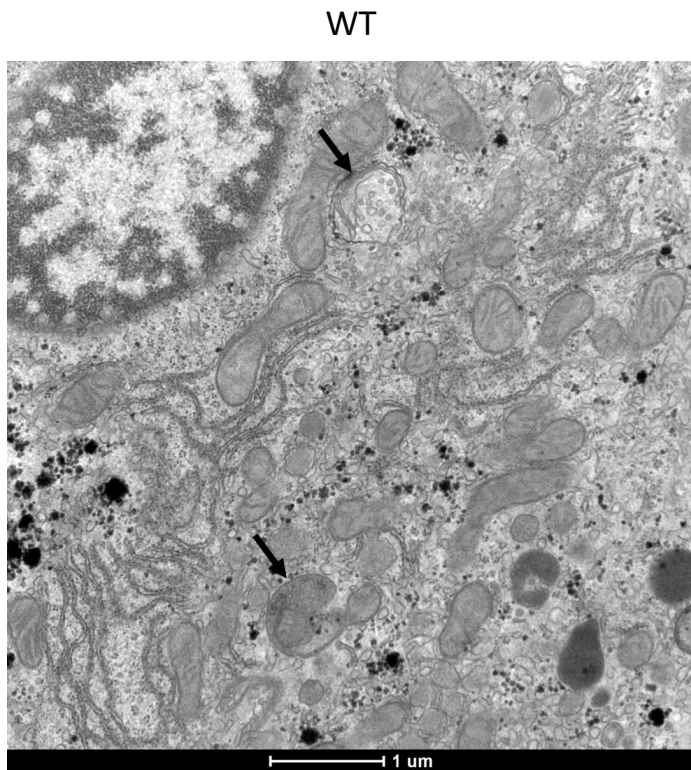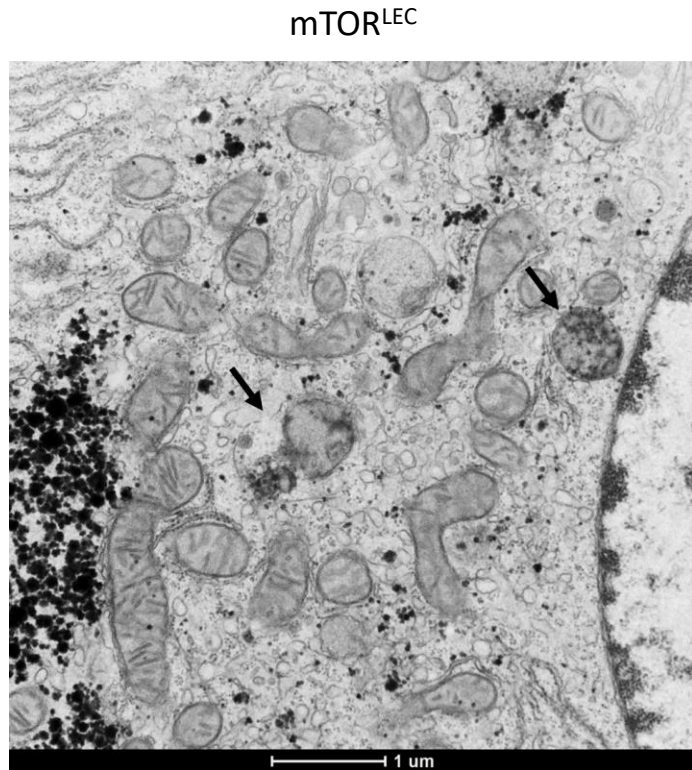

**p-Histone H3**

WT

mTOR<sup>LEC</sup>

Liver

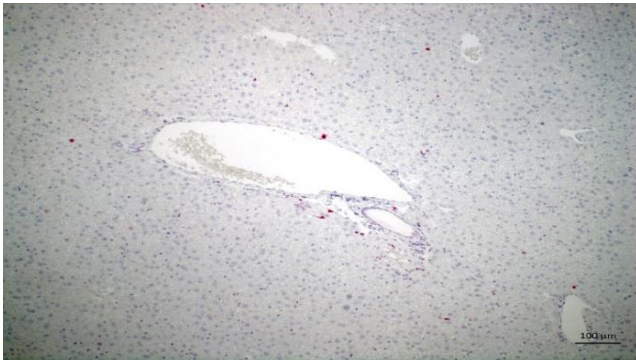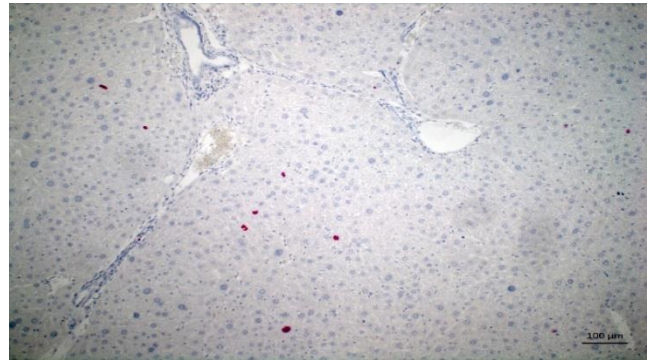

Metastasis

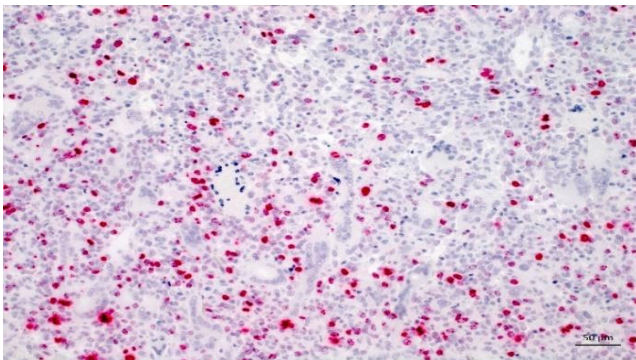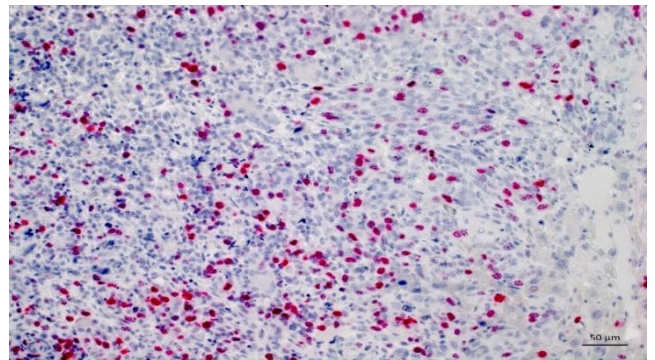

**Normal liver**

**Metastasis**

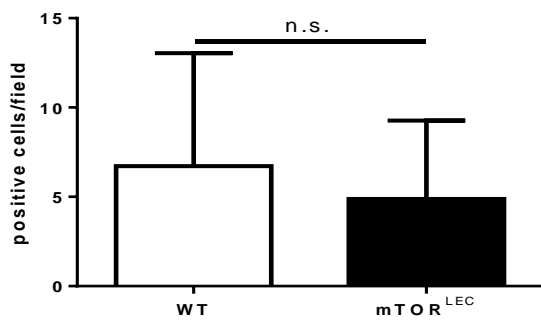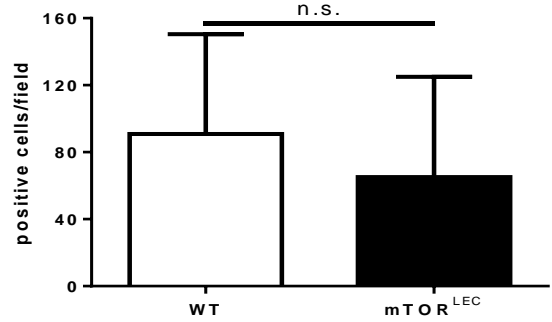

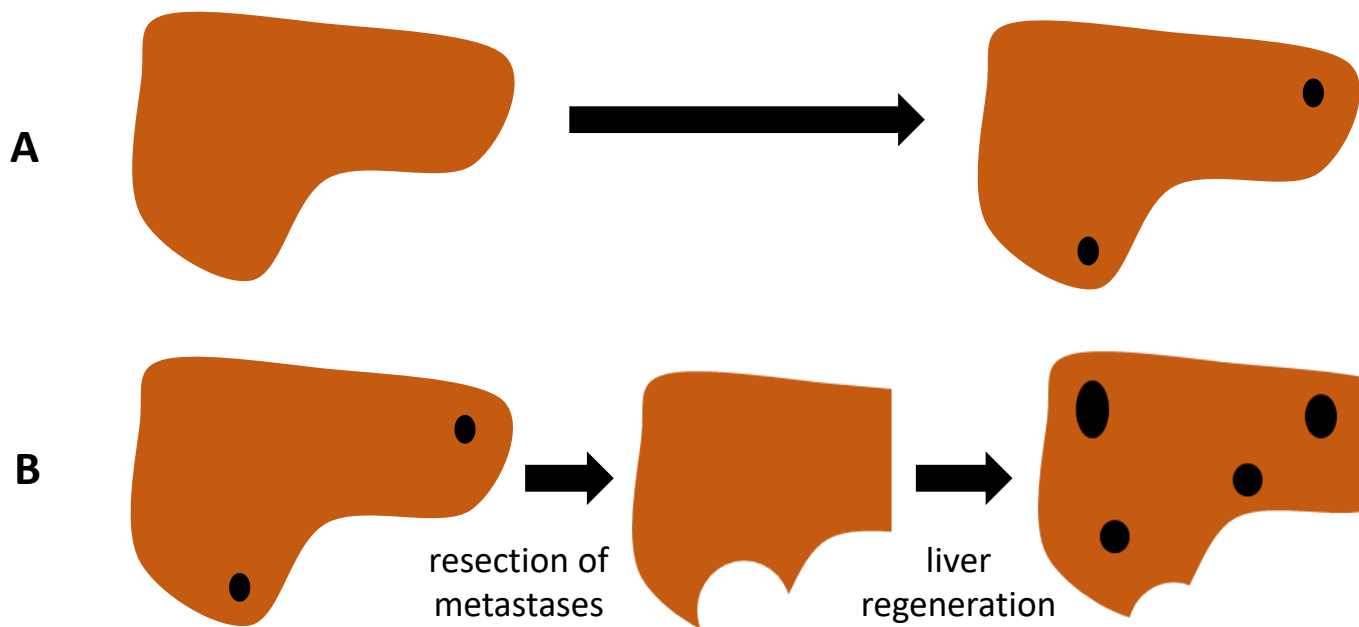

**p-Histone H3**

WT

mTOR<sup>LEC</sup>

Liver

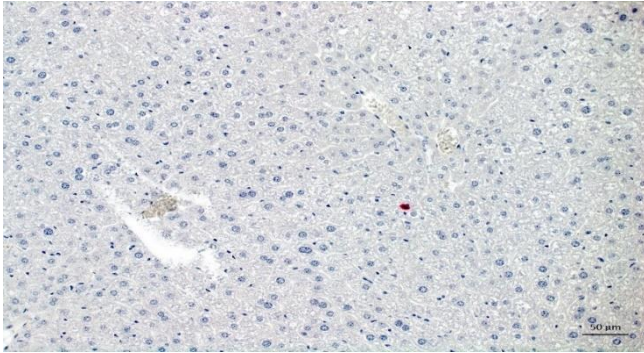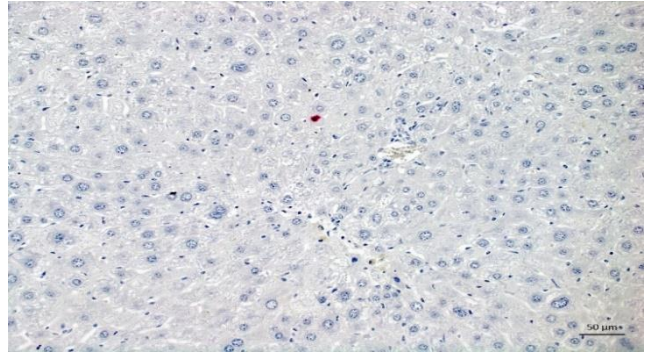

Metastasis

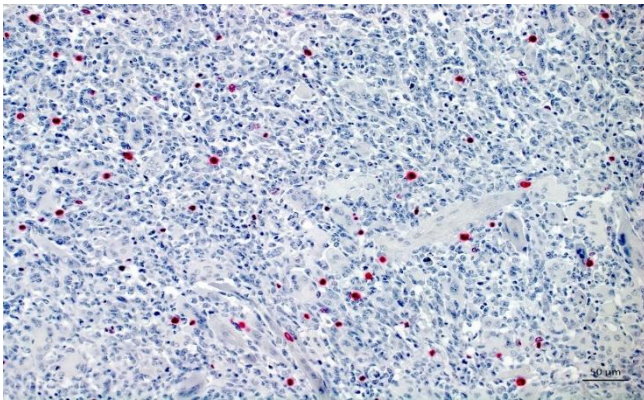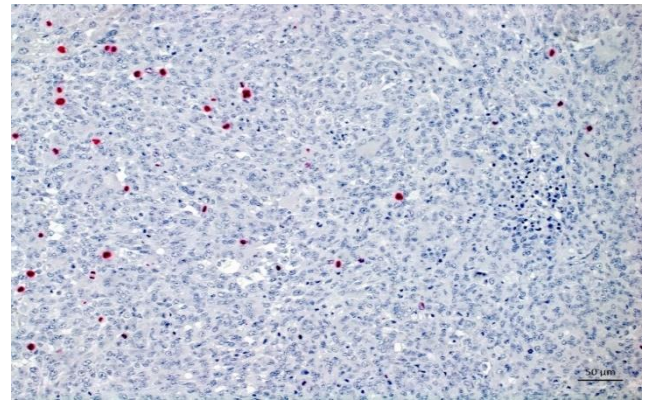

**Normal liver**

n.s.

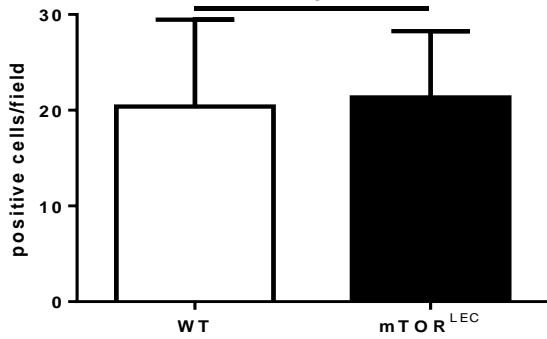

**Metastasis**

n.s.

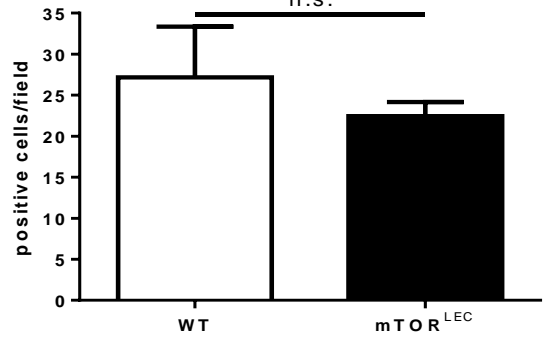

Supplement: Supplementary file [file media-1.pdf]
